# Supplementary material for: Benefit of Sunitinib in the treatment of pulmonary primitive neuroectodermal tumors: a case report and literature review
Source: PubMed Central journal article supplement (PMC5350009; doi:10.18632/oncotarget.13896), 2016-12-10
Supplement: oncotarget-07-87543-s001.pdf [file oncotarget-07-87543-s001.pdf]

## Benefit of Sunitinib in the treatment of pulmonary primitive neuroectodermal tumors: a case report and literature review

### Supplemental Information

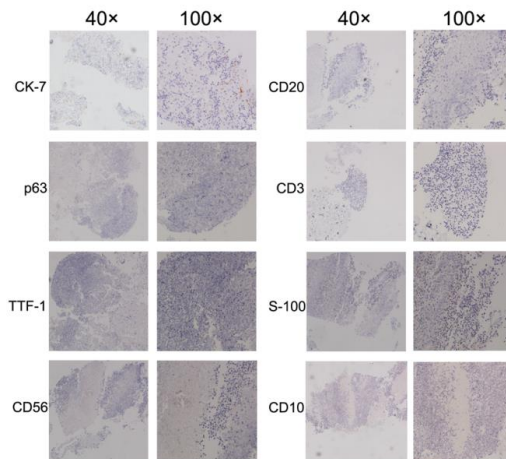

**Figure S1:**

Histologic features of the primary pulmonary PNET. The images for the immunohistochemistry staining of cytokeratin 7 (CK7), p63, thyroid transcription factor 1 (TTF-1), CD56, CD20, CD3, CD10 and protein S-100 (S-100).

**Table S1:**

All genomic alteration types, including base substitutions, insertions and deletions, copy number alterations and rearrangements on a panel of 390 genes commonly associated with cancers were detected for the pulmonary PNET patient.

| <b>Gene mutation</b> |          |        |        |       |        |        |        |        |         |         |        |        |
|----------------------|----------|--------|--------|-------|--------|--------|--------|--------|---------|---------|--------|--------|
| <b>ABL1</b>          | BCL2L2   | CDK4   | DDR2   | FAS   | GATA4  | INPP4B | MAGI2  | NF2    | PIK3CG  | RBM10   | SOX9   | TSC2   |
| <b>ABL2</b>          | BCL6     | CDK6   | DICER1 | FAT1  | GATA6  | IRF2   | MAP2K1 | NFE2L2 | PIK3R1  | RET     | SPEN   | TSHR   |
| <b>ACVR1B</b>        | BCOR     | CDK8   | DNMT3A | FBXW7 | GID4   | IRF4   | MAP2K2 | NFKBLA | PIK3R2  | RICTOR  | SPOP   | TYK2   |
| <b>ACVR2A</b>        | BCORL1   | CDKN1A | DOTIL  | FGF10 | GLI1   | IRS2   | MAP2K4 | NKX2-1 | PKD2    | RNF43   | SPTA1  | U2AF1  |
| <b>ADAM29</b>        | BIRC5    | CDKN1B | EGF    | FGF14 | GLI2   | ITK    | MAP3K1 | NOTCH1 | PLA2G1B | ROCK1   | SRC    | VEGFA  |
| <b>AKT1</b>          | BLK      | CDKN2A | EGFR   | FGF19 | GLI3   | JAK1   | MAP4K5 | NOTCH2 | PLCG2   | ROCK2   | SRMS   | VHL    |
| <b>AKT2</b>          | BLM      | CDKN2B | EP300  | FGF23 | GNA11  | JAK2   | MCL1   | NOTCH3 | PMS2    | ROS1    | STAG2  | WEE1   |
| <b>AKT3</b>          | BMX      | CDKN2C | EPHA2  | FGF3  | GNA13  | JAK3   | MDM2   | NPM1   | POLD1   | RPTOR   | STAT3  | WEE2   |
| <b>ALK</b>           | BRAF     | CEBPA  | EPHA3  | FGF4  | GNAQ   | JUN    | MDM4   | NRAS   | POLE    | RUNX1   | STAT4  | WISP3  |
| <b>AMER1</b>         | BRCA1    | CHD2   | EPHA5  | FGF6  | GNAS   | KAT6A  | MED12  | NRG1   | PPP2R1A | RUNX1T1 | STK11  | WT1    |
| <b>APC</b>           | BRCA2    | CHD4   | EPHA7  | FGFR1 | GPR124 | KDM5A  | MEF2B  | NRG3   | PRDM1   | RXRA    | STK24  | XIAP   |
| <b>AR</b>            | BRD4     | CHEK1  | EPHB1  | FGFR2 | GRIN2A | KDM5C  | MEN1   | NSD1   | PREX2   | SDHA    | SUFU   | XPO1   |
| <b>ARAF</b>          | BRIP1    | CHEK2  | ERBB2  | FGFR3 | GRM3   | KDM6A  | MET    | NTRK1  | PRKAR1A | SDHB    | SYK    | YES1   |
| <b>ARFRP1</b>        | BTG1     | CIC    | ERBB3  | FGFR4 | GSK3B  | KDR    | MITF   | NTRK2  | PRKCI   | SDHC    | TAF1   | ZBTB2  |
| <b>ARID1A</b>        | BTK      | CRBN   | ERBB4  | FGR   | H3F3A  | KEAP1  | MLH1   | NTRK3  | PRKDC   | SDHD    | TBX3   | ZNF217 |
| <b>ARID1B</b>        | C11orf30 | CREBBP | ERCC1  | FH    | HCK    | KEL    | MPL    | NUP93  | PRSS8   | SETD2   | TCF7L2 | ZNF703 |
| <b>ARID2</b>         | CARD11   | CRKL   | ERG    | FLCN  | HGF    | KIT    | MRE11A | PAK3   | PTCH1   | SF3B1   | TEK    | ZNF750 |
| <b>ASXL1</b>         | CBFB     | CRLF2  | ERRFI1 | FLT1  | HNF1A  | KLHL6  | MS4A1  | PALB2  | PTEN    | SIK1    | TET2   |        |

|               |       |         |         |        |          |       |       |          |        |         |          |  |
|---------------|-------|---------|---------|--------|----------|-------|-------|----------|--------|---------|----------|--|
| <b>ATM</b>    | CBL   | CSF1R   | ESR1    | FLT3   | HRAS     | KMT2A | MSH2  | PARK2    | PTK2   | SLIT2   | TGFBR1   |  |
| <b>ATR</b>    | CCND1 | CSK     | EZH2    | FLT4   | HSD3B1   | KMT2C | MSH6  | PAX5     | PTK6   | SMAD2   | TGFBR2   |  |
| <b>ATRX</b>   | CCND2 | CSNK1A1 | FAM135B | FOXL2  | HSP90AA1 | KMT2D | MST1R | PBRM1    | PTPN11 | SMAD3   | TIE1     |  |
| <b>AURKA</b>  | CCND3 | CTCF    | FAM46C  | FOXP1  | IDH1     | KRAS  | MTOR  | PDCD1LG2 | QKI    | SMAD4   | TNFAIP3  |  |
| <b>AURKB</b>  | CCNE1 | CTNNA1  | FANCA   | FRS2   | IDH2     | LCK   | MUTYH | PDGFRA   | RAC1   | SMARCA4 | TNFRSF14 |  |
| <b>AXIN1</b>  | CD274 | CTNNA1  | FANCC   | FUBP1  | IGF1R    | LIMK1 | MYC   | PDGFRB   | RAD50  | SMARCB1 | TNFSF11  |  |
| <b>AXL</b>    | CD79A | CUL3    | FANCD2  | FYN    | IGF2     | LMO1  | MYCL  | PDK1     | RAD51  | SMO     | TNK2     |  |
| <b>BAP1</b>   | CD79B | CXCR4   | FANCE   | GABRA6 | IKBKE    | LRP1  | MYCN  | PIK3C2B  | RAF1   | SNCAIP  | TOP1     |  |
| <b>BARD1</b>  | CDC73 | CYLD    | FANCF   | GATA1  | IKZF1    | LRP1B | MYD88 | PIK3CA   | RANBP2 | SOCS1   | TOP2A    |  |
| <b>BCL2</b>   | CDH1  | DAXX    | FANCG   | GATA2  | IL7R     | LYN   | NEK11 | PIK3CB   | RARA   | SOX10   | TP53     |  |
| <b>BCL2L1</b> | CDK12 | DDR1    | FANCL   | GATA3  | INHBA    | LZTR1 | NF1   | PIK3CD   | RB1    | SOX2    | TSC1     |  |

| <b>Fusion Gene</b> |        |       |       |        |      |      |      |      |             |       |       |       |
|--------------------|--------|-------|-------|--------|------|------|------|------|-------------|-------|-------|-------|
| <b>ALK</b>         | BCR    | BRAF  | BRCA1 | BRCA2  | BRD4 | ETV1 | ETV4 | ETV5 | ETV6        | FGFR1 | FGFR2 | FGFR3 |
| <b>MYB</b>         | NOTCH2 | NTRK1 | NTRK2 | PDGFRA | RAF1 | RARA | RET  | ROS1 | TMPRSS<br>2 | MET   | DDR2  |       |

**Table S2. Primary Pulmonary Primitive Neuroectodermal Tumor Patients Reported in the Literatures**

| <b>Year</b> | <b>Age</b> | <b>Gender</b> | <b>Treatment</b>  | <b>Follow-up</b> | <b>Reference</b> |
|-------------|------------|---------------|-------------------|------------------|------------------|
| 2015        | 26         | M             | R/ad CRT          | DOD at 3M        | 7                |
| 2015        | 16         | M             | R/ad CRT          | DOD at 5M        | 4                |
| 2014        | 31         | F             | CT                | DOD at 1M        | 8                |
| 2013        | 75         | M             | CT                | A&W at 17M       | 9                |
| 2013        | 31         |               | R/ad CRT          | DOD at 36M       | 10               |
| 2012        | 22         | M             | R only            | NK               | 11               |
|             | 27         | M             | R/ad CRT          | DOD at 24M       |                  |
|             | 29         | F             | R/ad CT           | DOD at 36M       |                  |
|             | 31         | M             | R/ad CT           | DOD at 54M       |                  |
|             | 29         | M             | R only            | NK               |                  |
|             | 56         | F             | Neoad CT/R/ad CT  | A&W at 11M       |                  |
| 2010        | 44         | M             | R/ad CT           | DOD at 5M        | 12               |
| 2009        | 22         | F             | Neoad CT/R/ad CRT | A&W at 32M       | 13               |
|             | 28         | F             | R/ad CT           | A&W at 18M       |                  |
|             | 22         | M             | R/ad CT           | DOD at 18M       |                  |
|             | 47         | M             | Neoad CT/R/ad CT  | A&W at 34M       |                  |
| 2007        | 8          | M             | R/ad CT           | A&W at 9M        | 14               |
| 2001        | 17         | M             | R/ad CRT          | DOD at 9M        | 15               |
| 2001        | 18         | M             | R only            | DOD at 24M       | 16               |

|      |    |   |                      |            |    |
|------|----|---|----------------------|------------|----|
| 2001 | 26 | F | Neoad CT/R/ad<br>CRT | DOD at 18M | 17 |
| 2000 | 30 | F | Neoad CT/R/ad CT     | A&W at 16M | 18 |
|      | 41 | M | Neoad CT/R           | A&W at 22M | 19 |
| 1998 | 25 | F | R only               | DOD at 24M |    |
|      | 15 | M | R only               | A&W at 24M |    |
